# Supplementary material
Source: publisher figshare collection journal article supplement (https://acs.figshare.com/ndownloader/files/4369678)
Supplement: Supplementary file 1 [file 4369678]

 data_byproduct
 
_audit_creation_method            SHELXL-97 
_chemical_name_systematic 
; 
byproduct
; 
_chemical_name_common             byproduct 
_chemical_melting_point           ? 
_chemical_formula_moiety           'C24 H20 Cl N O2 S2'  
_chemical_formula_sum 
 'C24 H20 Cl N O2 S2' 
_chemical_formula_weight          453.98 
 
loop_ 
 _atom_type_symbol 
 _atom_type_description 
 _atom_type_scat_dispersion_real 
 _atom_type_scat_dispersion_imag 
 _atom_type_scat_source 
 'S'  'S'   0.1246   0.1234 
 'International Tables Vol C Tables 4.2.6.8 and 6.1.1.4' 
 'O'  'O'   0.0106   0.0060 
 'International Tables Vol C Tables 4.2.6.8 and 6.1.1.4' 
 'N'  'N'   0.0061   0.0033 
 'International Tables Vol C Tables 4.2.6.8 and 6.1.1.4' 
 'C'  'C'   0.0033   0.0016 
 'International Tables Vol C Tables 4.2.6.8 and 6.1.1.4' 
 'H'  'H'   0.0000   0.0000 
 'International Tables Vol C Tables 4.2.6.8 and 6.1.1.4' 
 'Cl'  'Cl'   0.1484   0.1585 
 'International Tables Vol C Tables 4.2.6.8 and 6.1.1.4' 
 
_symmetry_cell_setting                 triclinic
_symmetry_space_group_name_H-M        'P -1         '
_symmetry_Int_Tables_number            2
 
loop_ 
 _symmetry_equiv_pos_as_xyz 
 'x, y, z' 
 '-x, -y, -z' 
 
_cell_length_a                    9.1985(11) 
_cell_length_b                    9.5493(13) 
_cell_length_c                    13.2712(16) 
_cell_angle_alpha                 75.930(3) 
_cell_angle_beta                  75.466(3) 
_cell_angle_gamma                 82.159(3) 
_cell_volume                      1091.0(2) 
_cell_formula_units_Z             2 
_cell_measurement_temperature     150(2) 
_cell_measurement_reflns_used     6757
_cell_measurement_theta_min       3.0
_cell_measurement_theta_max       27.4
 
_exptl_crystal_description        'block' 
_exptl_crystal_colour             'violet'
_exptl_crystal_size_max           0.700
_exptl_crystal_size_mid           0.250
_exptl_crystal_size_min           0.100
_exptl_crystal_density_meas       ? 
_exptl_crystal_density_diffrn     1.382 
_exptl_crystal_density_method     'not measured' 
_exptl_crystal_F_000              472 
_exptl_absorpt_coefficient_mu     0.388 
_exptl_absorpt_correction_type    none
_exptl_absorpt_correction_T_min   ? 
_exptl_absorpt_correction_T_max   ? 
_exptl_absorpt_process_details    ? 
 
_exptl_special_details 
; 
 ? 
; 
 
_diffrn_ambient_temperature       150(2) 
_diffrn_radiation_wavelength      0.71075 
_diffrn_radiation_type            MoK\a 
_diffrn_radiation_source          'fine-focus sealed tube' 
_diffrn_radiation_monochromator   graphite 
_diffrn_measurement_device_type   'Rigaku RAXIS-RAPID Imaging Plate'
_diffrn_measurement_method        \w 
_diffrn_detector_area_resol_mean  10.00
_diffrn_standards_number          9599
_diffrn_standards_interval_count  ? 
_diffrn_standards_interval_time   ? 
_diffrn_standards_decay_%         ? 
_diffrn_reflns_number             9590 
_diffrn_reflns_av_R_equivalents   0.0767 
_diffrn_reflns_av_sigmaI/netI     0.0945 
_diffrn_reflns_limit_h_min        -10 
_diffrn_reflns_limit_h_max        11 
_diffrn_reflns_limit_k_min        -12 
_diffrn_reflns_limit_k_max        12 
_diffrn_reflns_limit_l_min        -17 
_diffrn_reflns_limit_l_max        17 
_diffrn_reflns_theta_min          3.01 
_diffrn_reflns_theta_max          27.46 
_reflns_number_total              4593 
_reflns_number_gt                 2502 
_reflns_threshold_expression      >2sigma(I) 
 
_computing_data_collection        'PROCESS-AUTO' 
_computing_cell_refinement        'PROCESS-AUTO' 
_computing_data_reduction         'teXsan Ver. 1.11'
_computing_structure_solution     'SHELXS-97 (Sheldrick, 1990)' 
_computing_structure_refinement   'SHELXL-97 (Sheldrick, 1997)' 
_computing_molecular_graphics     ? 
_computing_publication_material   ? 
 
_refine_special_details 
; 
 Refinement of F^2^ against ALL reflections.  The weighted R-factor wR and 
 goodness of fit S are based on F^2^, conventional R-factors R are based 
 on F, with F set to zero for negative F^2^. The threshold expression of 
 F^2^ > 2sigma(F^2^) is used only for calculating R-factors(gt) etc. and is 
 not relevant to the choice of reflections for refinement.  R-factors based 
 on F^2^ are statistically about twice as large as those based on F, and R- 
 factors based on ALL data will be even larger. 
; 
 
_refine_ls_structure_factor_coef  Fsqd  
_refine_ls_matrix_type            full 
_refine_ls_weighting_scheme       calc  
_refine_ls_weighting_details 
 'calc w=1/[\s^2^(Fo^2^)+(0.1625P)^2^+0.0000P] where P=(Fo^2^+2Fc^2^)/3' 
_atom_sites_solution_primary      direct 
_atom_sites_solution_secondary    difmap 
_atom_sites_solution_hydrogens    geom 
_refine_ls_hydrogen_treatment     noref
_refine_ls_extinction_method      none 
_refine_ls_extinction_coef        ? 
_refine_ls_number_reflns          4593 
_refine_ls_number_parameters      271 
_refine_ls_number_restraints      0 
_refine_ls_R_factor_all           0.1221 
_refine_ls_R_factor_gt            0.0912 
_refine_ls_wR_factor_ref          0.2838 
_refine_ls_wR_factor_gt           0.2632 
_refine_ls_goodness_of_fit_ref    0.979 
_refine_ls_restrained_S_all       0.979 
_refine_ls_shift/su_max           0.000 
_refine_ls_shift/su_mean          0.000 
 
loop_ 
 _atom_site_label 
 _atom_site_type_symbol 
 _atom_site_fract_x 
 _atom_site_fract_y 
 _atom_site_fract_z 
 _atom_site_U_iso_or_equiv 
 _atom_site_adp_type 
 _atom_site_occupancy 
 _atom_site_symmetry_multiplicity 
 _atom_site_calc_flag 
 _atom_site_refinement_flags 
 _atom_site_disorder_assembly 
 _atom_site_disorder_group 
Cl1 Cl 0.89245(16) 0.27789(15) 0.27300(11) 0.0769(5) Uani 1 1 d . . . 
S1 S 0.36892(14) 0.88340(12) 0.15694(10) 0.0584(4) Uani 1 1 d . . . 
S2 S 0.17644(14) 1.06167(12) -0.12383(10) 0.0592(4) Uani 1 1 d . . . 
O1 O 0.4629(4) 0.7761(4) 0.3307(3) 0.0662(9) Uani 1 1 d . . . 
O2 O 0.0566(4) 1.1464(4) -0.2927(3) 0.0683(9) Uani 1 1 d . . . 
N1 N -0.1902(5) 1.5181(5) -0.1170(4) 0.0721(12) Uani 1 1 d . . . 
C1 C 0.4904(5) 0.7312(5) 0.1288(4) 0.0555(11) Uani 1 1 d . . . 
C2 C 0.4912(6) 0.7160(5) 0.0226(4) 0.0605(12) Uani 1 1 d . . . 
C3 C 0.4026(6) 0.8154(5) -0.0284(4) 0.0588(11) Uani 1 1 d . . . 
C4 C 0.3244(5) 0.9217(5) 0.0318(4) 0.0559(11) Uani 1 1 d . . . 
C5 C 0.2289(5) 1.0351(5) -0.0013(4) 0.0577(11) Uani 1 1 d . . . 
C6 C 0.1547(6) 1.1470(5) 0.0540(4) 0.0605(12) Uani 1 1 d . . . 
C7 C 0.0638(6) 1.2430(5) 0.0002(4) 0.0619(12) Uani 1 1 d . . . 
C8 C 0.0588(5) 1.2139(5) -0.0995(4) 0.0558(11) Uani 1 1 d . . . 
C9 C 0.5701(5) 0.6455(5) 0.1979(4) 0.0579(11) Uani 1 1 d . . . 
C10 C 0.5563(6) 0.6815(5) 0.3033(4) 0.0577(11) Uani 1 1 d . . . 
C11 C 0.6562(6) 0.6005(5) 0.3739(4) 0.0624(12) Uani 1 1 d . . . 
C12 C 0.6483(7) 0.6646(6) 0.4700(4) 0.0700(13) Uani 1 1 d . . . 
C13 C 0.6730(6) 0.5155(5) 0.1714(4) 0.0584(11) Uani 1 1 d . . . 
C14 C 0.6139(6) 0.3724(5) 0.2343(4) 0.0602(12) Uani 1 1 d . . . 
C15 C 0.4649(6) 0.3479(5) 0.2450(4) 0.0651(13) Uani 1 1 d . . . 
C16 C 0.4083(7) 0.2166(6) 0.2977(5) 0.0739(14) Uani 1 1 d . . . 
C17 C 0.5012(8) 0.1050(5) 0.3424(5) 0.0791(17) Uani 1 1 d . . . 
C18 C 0.6494(8) 0.1250(6) 0.3338(4) 0.0762(16) Uani 1 1 d . . . 
C19 C 0.7025(6) 0.2579(5) 0.2817(4) 0.0624(12) Uani 1 1 d . . . 
C20 C -0.0255(5) 1.2947(5) -0.1704(4) 0.0578(11) Uani 1 1 d . . . 
C21 C -0.1171(6) 1.4188(5) -0.1426(4) 0.0601(12) Uani 1 1 d . . . 
C22 C -0.0202(6) 1.2559(5) -0.2722(4) 0.0596(12) Uani 1 1 d . . . 
C23 C -0.1032(6) 1.3533(5) -0.3493(4) 0.0649(12) Uani 1 1 d . . . 
C24 C -0.0978(7) 1.2924(7) -0.4460(5) 0.0794(16) Uani 1 1 d . . . 
H1 H 0.5530 0.6417 -0.0102 0.071 Uiso 1 1 d . . . 
H2 H 0.3898 0.8167 -0.0984 0.071 Uiso 1 1 d . . . 
H3 H 0.1693 1.1528 0.1221 0.072 Uiso 1 1 d . . . 
H4 H 0.0058 1.3234 0.0274 0.073 Uiso 1 1 d . . . 
H5 H 0.6288 0.5032 0.3993 0.076 Uiso 1 1 d . . . 
H6 H 0.7579 0.5991 0.3329 0.076 Uiso 1 1 d . . . 
H7 H 0.7150 0.6096 0.5122 0.084 Uiso 1 1 d . . . 
H8 H 0.6778 0.7623 0.4459 0.084 Uiso 1 1 d . . . 
H9 H 0.5487 0.6663 0.5124 0.084 Uiso 1 1 d . . . 
H10 H 0.6871 0.5191 0.0968 0.071 Uiso 1 1 d . . . 
H11 H 0.7689 0.5217 0.1852 0.071 Uiso 1 1 d . . . 
H12 H 0.3986 0.4253 0.2145 0.076 Uiso 1 1 d . . . 
H13 H 0.3044 0.2029 0.3034 0.090 Uiso 1 1 d . . . 
H14 H 0.4615 0.0136 0.3790 0.094 Uiso 1 1 d . . . 
H15 H 0.7149 0.0485 0.3644 0.091 Uiso 1 1 d . . . 
H16 H -0.2062 1.3695 -0.3131 0.080 Uiso 1 1 d . . . 
H17 H -0.0603 1.4450 -0.3736 0.080 Uiso 1 1 d . . . 
H18 H -0.1435 1.2009 -0.4230 0.096 Uiso 1 1 d . . . 
H19 H -0.1529 1.3561 -0.4932 0.096 Uiso 1 1 d . . . 
H20 H 0.0029 1.2756 -0.4832 0.096 Uiso 1 1 d . . . 
 
loop_ 
 _atom_site_aniso_label 
 _atom_site_aniso_U_11 
 _atom_site_aniso_U_22 
 _atom_site_aniso_U_33 
 _atom_site_aniso_U_23 
 _atom_site_aniso_U_13 
 _atom_site_aniso_U_12 
Cl1 0.0872(9) 0.0625(8) 0.0791(9) -0.0110(7) -0.0328(7) 0.0182(7) 
S1 0.0770(8) 0.0362(6) 0.0621(7) -0.0056(5) -0.0248(6) 0.0025(5) 
S2 0.0765(8) 0.0380(6) 0.0648(7) -0.0066(5) -0.0270(6) 0.0020(5) 
O1 0.086(2) 0.050(2) 0.066(2) -0.0145(16) -0.0268(18) 0.0065(17) 
O2 0.088(2) 0.048(2) 0.072(2) -0.0124(17) -0.0318(19) 0.0077(17) 
N1 0.083(3) 0.057(3) 0.081(3) -0.017(2) -0.032(2) 0.008(2) 
C1 0.074(3) 0.032(2) 0.060(3) -0.0039(19) -0.021(2) -0.005(2) 
C2 0.083(3) 0.040(2) 0.060(3) -0.008(2) -0.023(2) 0.001(2) 
C3 0.077(3) 0.041(2) 0.061(3) -0.007(2) -0.024(2) -0.004(2) 
C4 0.068(3) 0.038(2) 0.062(3) -0.004(2) -0.021(2) -0.006(2) 
C5 0.068(3) 0.042(3) 0.061(3) -0.003(2) -0.020(2) -0.003(2) 
C6 0.073(3) 0.043(3) 0.064(3) -0.005(2) -0.020(2) -0.005(2) 
C7 0.077(3) 0.040(3) 0.068(3) -0.008(2) -0.022(3) 0.000(2) 
C8 0.067(3) 0.037(2) 0.063(3) -0.004(2) -0.021(2) -0.005(2) 
C9 0.073(3) 0.036(2) 0.063(3) -0.006(2) -0.017(2) -0.003(2) 
C10 0.073(3) 0.036(2) 0.061(3) -0.004(2) -0.015(2) -0.007(2) 
C11 0.082(3) 0.043(3) 0.064(3) -0.009(2) -0.027(2) 0.001(2) 
C12 0.092(3) 0.054(3) 0.067(3) -0.009(2) -0.032(3) 0.001(3) 
C13 0.076(3) 0.036(2) 0.063(3) -0.005(2) -0.023(2) 0.001(2) 
C14 0.084(3) 0.036(2) 0.061(3) -0.009(2) -0.020(2) -0.002(2) 
C15 0.087(3) 0.043(3) 0.068(3) -0.012(2) -0.026(3) 0.000(2) 
C16 0.099(4) 0.049(3) 0.077(3) -0.018(3) -0.015(3) -0.019(3) 
C17 0.121(5) 0.036(3) 0.077(3) -0.008(2) -0.015(3) -0.015(3) 
C18 0.114(4) 0.040(3) 0.070(3) -0.010(2) -0.021(3) 0.007(3) 
C19 0.083(3) 0.042(3) 0.062(3) -0.009(2) -0.023(2) 0.005(2) 
C20 0.071(3) 0.038(2) 0.063(3) -0.003(2) -0.023(2) -0.001(2) 
C21 0.071(3) 0.043(3) 0.068(3) -0.003(2) -0.028(2) -0.004(2) 
C22 0.071(3) 0.044(3) 0.066(3) -0.003(2) -0.026(2) -0.008(2) 
C23 0.078(3) 0.047(3) 0.069(3) 0.003(2) -0.029(3) -0.007(2) 
C24 0.099(4) 0.072(4) 0.070(3) -0.007(3) -0.042(3) 0.009(3) 
 
_geom_special_details 
; 
 All esds (except the esd in the dihedral angle between two l.s. planes) 
 are estimated using the full covariance matrix.  The cell esds are taken 
 into account individually in the estimation of esds in distances, angles 
 and torsion angles; correlations between esds in cell parameters are only 
 used when they are defined by crystal symmetry.  An approximate (isotropic) 
 treatment of cell esds is used for estimating esds involving l.s. planes. 
; 
 
loop_ 
 _geom_bond_atom_site_label_1 
 _geom_bond_atom_site_label_2 
 _geom_bond_distance 
 _geom_bond_site_symmetry_2 
 _geom_bond_publ_flag 
Cl1 C19 1.756(6) . yes 
S1 C4 1.750(5) . yes 
S1 C1 1.764(5) . yes 
S2 C8 1.736(5) . yes 
S2 C5 1.761(5) . yes 
O1 C10 1.215(5) . yes 
O2 C22 1.228(6) . yes 
N1 C21 1.156(6) . yes 
C1 C9 1.362(7) . yes 
C1 C2 1.450(6) . yes 
C2 C3 1.333(7) . yes 
C3 C4 1.447(6) . yes 
C4 C5 1.356(6) . yes 
C5 C6 1.441(6) . yes 
C6 C7 1.350(7) . yes 
C7 C8 1.429(7) . yes 
C8 C20 1.390(6) . yes 
C9 C10 1.492(6) . yes 
C9 C13 1.512(6) . yes 
C10 C11 1.486(7) . yes 
C11 C12 1.524(7) . yes 
C13 C14 1.510(7) . yes 
C14 C15 1.388(7) . yes 
C14 C19 1.391(6) . yes 
C15 C16 1.379(8) . yes 
C16 C17 1.384(9) . yes 
C17 C18 1.375(9) . yes 
C18 C19 1.379(8) . yes 
C20 C21 1.427(6) . yes 
C20 C22 1.472(7) . yes 
C22 C23 1.493(7) . yes 
C23 C24 1.520(8) . yes 
 
loop_ 
 _geom_angle_atom_site_label_1 
 _geom_angle_atom_site_label_2 
 _geom_angle_atom_site_label_3 
 _geom_angle 
 _geom_angle_site_symmetry_1 
 _geom_angle_site_symmetry_3 
 _geom_angle_publ_flag 
C4 S1 C1 92.0(2) . . yes 
C8 S2 C5 91.5(2) . . yes 
C9 C1 C2 127.2(4) . . yes 
C9 C1 S1 123.7(4) . . yes 
C2 C1 S1 109.1(3) . . yes 
C3 C2 C1 114.9(4) . . yes 
C2 C3 C4 113.8(4) . . yes 
C5 C4 C3 126.1(5) . . yes 
C5 C4 S1 123.7(4) . . yes 
C3 C4 S1 110.2(3) . . yes 
C4 C5 C6 127.8(5) . . yes 
C4 C5 S2 122.1(4) . . yes 
C6 C5 S2 110.2(3) . . yes 
C7 C6 C5 113.2(4) . . yes 
C6 C7 C8 114.3(4) . . yes 
C20 C8 C7 126.3(4) . . yes 
C20 C8 S2 122.9(4) . . yes 
C7 C8 S2 110.9(3) . . yes 
C1 C9 C10 118.9(4) . . yes 
C1 C9 C13 122.4(4) . . yes 
C10 C9 C13 118.7(4) . . yes 
O1 C10 C11 120.8(4) . . yes 
O1 C10 C9 119.6(4) . . yes 
C11 C10 C9 119.6(4) . . yes 
C10 C11 C12 113.9(4) . . yes 
C14 C13 C9 113.7(4) . . yes 
C15 C14 C19 116.3(5) . . yes 
C15 C14 C13 120.2(4) . . yes 
C19 C14 C13 123.5(5) . . yes 
C16 C15 C14 122.0(5) . . yes 
C15 C16 C17 119.7(6) . . yes 
C18 C17 C16 120.0(5) . . yes 
C17 C18 C19 119.0(5) . . yes 
C18 C19 C14 122.9(5) . . yes 
C18 C19 Cl1 117.2(4) . . yes 
C14 C19 Cl1 119.8(4) . . yes 
C8 C20 C21 118.0(4) . . yes 
C8 C20 C22 121.7(4) . . yes 
C21 C20 C22 120.3(4) . . yes 
N1 C21 C20 177.9(5) . . yes 
O2 C22 C20 118.8(4) . . yes 
O2 C22 C23 121.8(4) . . yes 
C20 C22 C23 119.4(4) . . yes 
C22 C23 C24 113.0(4) . . yes 
 
loop_ 
 _geom_torsion_atom_site_label_1 
 _geom_torsion_atom_site_label_2 
 _geom_torsion_atom_site_label_3 
 _geom_torsion_atom_site_label_4 
 _geom_torsion 
 _geom_torsion_site_symmetry_1 
 _geom_torsion_site_symmetry_2 
 _geom_torsion_site_symmetry_3 
 _geom_torsion_site_symmetry_4 
 _geom_torsion_publ_flag 
C4 S1 C1 C9 179.2(4) . . . . yes 
C4 S1 C1 C2 -0.1(4) . . . . yes 
C9 C1 C2 C3 -179.8(5) . . . . yes 
S1 C1 C2 C3 -0.5(6) . . . . yes 
C1 C2 C3 C4 1.1(7) . . . . yes 
C2 C3 C4 C5 179.3(5) . . . . yes 
C2 C3 C4 S1 -1.2(6) . . . . yes 
C1 S1 C4 C5 -179.7(5) . . . . yes 
C1 S1 C4 C3 0.7(4) . . . . yes 
C3 C4 C5 C6 -176.7(4) . . . . yes 
S1 C4 C5 C6 3.8(8) . . . . yes 
C3 C4 C5 S2 4.4(7) . . . . yes 
S1 C4 C5 S2 -175.1(3) . . . . yes 
C8 S2 C5 C4 178.3(4) . . . . yes 
C8 S2 C5 C6 -0.8(4) . . . . yes 
C4 C5 C6 C7 -178.6(5) . . . . yes 
S2 C5 C6 C7 0.4(6) . . . . yes 
C5 C6 C7 C8 0.4(7) . . . . yes 
C6 C7 C8 C20 179.7(5) . . . . yes 
C6 C7 C8 S2 -1.0(6) . . . . yes 
C5 S2 C8 C20 -179.7(4) . . . . yes 
C5 S2 C8 C7 1.0(4) . . . . yes 
C2 C1 C9 C10 178.6(4) . . . . yes 
S1 C1 C9 C10 -0.5(7) . . . . yes 
C2 C1 C9 C13 -1.0(8) . . . . yes 
S1 C1 C9 C13 179.8(4) . . . . yes 
C1 C9 C10 O1 7.9(7) . . . . yes 
C13 C9 C10 O1 -172.4(4) . . . . yes 
C1 C9 C10 C11 -172.5(4) . . . . yes 
C13 C9 C10 C11 7.1(7) . . . . yes 
O1 C10 C11 C12 -10.1(7) . . . . yes 
C9 C10 C11 C12 170.4(4) . . . . yes 
C1 C9 C13 C14 -109.3(5) . . . . yes 
C10 C9 C13 C14 71.1(6) . . . . yes 
C9 C13 C14 C15 46.4(6) . . . . yes 
C9 C13 C14 C19 -135.4(5) . . . . yes 
C19 C14 C15 C16 -1.2(7) . . . . yes 
C13 C14 C15 C16 177.1(4) . . . . yes 
C14 C15 C16 C17 0.4(8) . . . . yes 
C15 C16 C17 C18 -0.3(8) . . . . yes 
C16 C17 C18 C19 1.0(8) . . . . yes 
C17 C18 C19 C14 -2.0(8) . . . . yes 
C17 C18 C19 Cl1 179.9(4) . . . . yes 
C15 C14 C19 C18 2.0(7) . . . . yes 
C13 C14 C19 C18 -176.2(4) . . . . yes 
C15 C14 C19 Cl1 -179.9(3) . . . . yes 
C13 C14 C19 Cl1 1.9(7) . . . . yes 
C7 C8 C20 C21 -0.2(8) . . . . yes 
S2 C8 C20 C21 -179.3(4) . . . . yes 
C7 C8 C20 C22 179.0(5) . . . . yes 
S2 C8 C20 C22 -0.2(7) . . . . yes 
C8 C20 C22 O2 2.7(7) . . . . yes 
C21 C20 C22 O2 -178.1(4) . . . . yes 
C8 C20 C22 C23 -175.0(5) . . . . yes 
C21 C20 C22 C23 4.2(7) . . . . yes 
O2 C22 C23 C24 7.2(7) . . . . yes 
C20 C22 C23 C24 -175.1(5) . . . . yes 
 
_diffrn_measured_fraction_theta_max    0.920 
_diffrn_reflns_theta_full              27.46 
_diffrn_measured_fraction_theta_full   0.920 
_refine_diff_density_max    0.807 
_refine_diff_density_min   -0.443 
_refine_diff_density_rms    0.094 
